# Supplementary material
Source: Springer Nature journal article supplement (https://www.springermedizin.de/resource/supplementary/13229_2013_119_MOESM4_ESM.pdf/9676210)

AQ social skill

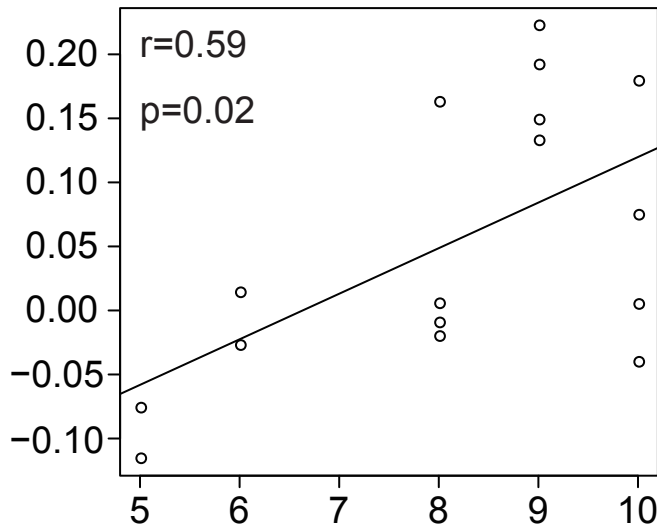

AQ attention to detail

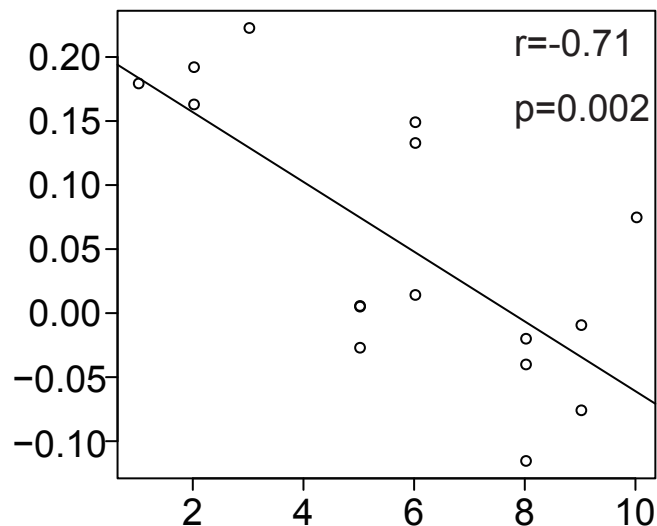

IRI

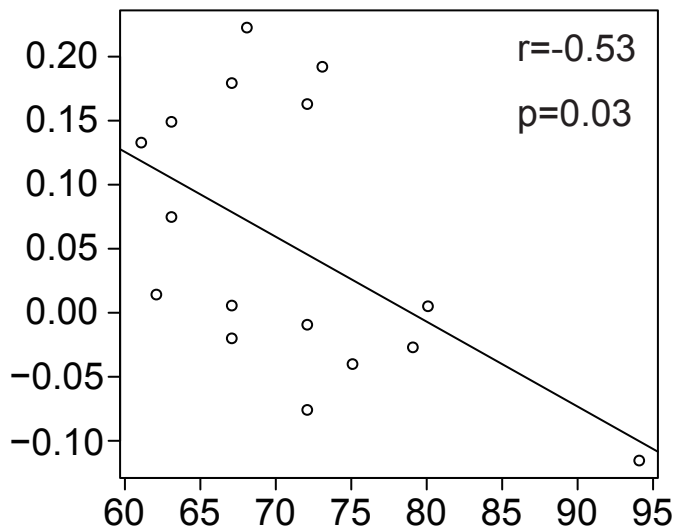

SFS

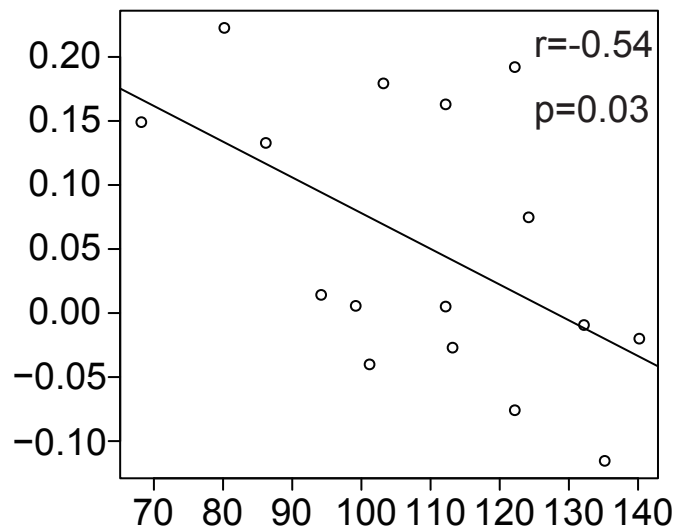

Supplement: MOESM4 [file 9676210]
